# Supplementary material for: Combined two-photon excitation and d → f energy-transfer in Ir/lanthanide dyads with time-gated selection from a two-component emission spectrum
Source: Royal Society of Chemistry journal article supplement (doi:10.1039/c2cc33005a), 2012-01-01
Supplement: c2cc33005a.pdf [file c2cc33005a.pdf]

## Combined two-photon excitation and d→f energy-transfer in Ir/lanthanide dyads with time-gated selection from a two-component emission spectrum

R. M. Edkins, D. Sykes, A. Beeby\* and M. D. Ward\*

### *Supporting Information:*

#### *Experimental information for the Two-photon absorption (TPA) spectroscopy*

The two-photon cross-section of  $[\text{Ir}(\text{F}_2\text{ppy})_2(\text{py-pz})]^+$  was measured using the femtosecond TPA induced fluorescence method. A mode-locked, cavity dumped (APE Pulse switch) Ti:sapphire laser (Coherent MIRA) was pumped by the 2nd harmonic (532 nm) of a CW Nd:YAG laser (Coherent Verdi V6) at a power of 4.5 W to create a pulsed excitation source. The pulse characteristics were: a temporal full width at half maximum (FWHM) of ~150 fs, average power 10 mW at a repetition rate of ~2.5 MHz and an energy of 4 nJ pulse<sup>-1</sup>. A variable ND filter (Edmund Optics) mounted on a translation stage was used to control the light intensity incident on the sample, with the power monitored by splitting the beam to a photodiode of known response, calibrated against a free standing power meter. Gold mirrors, highly reflective of NIR radiation, were used with a 20x objective (Olympus LWD C A20) to focus the source onto the sample. A 55 μM sample of the nitrate salt of the complex in aerated dichloromethane was prepared in a 1 cm path length quartz cuvette. Two-photon excited photoluminescence spectra were collected with a dichroic mirror (Semrock FF735) and detected with a 100 μm core fibre optic cable coupled CCD spectrograph (Avantes Avaspec 2048FT) fitted with a 700 nm shortpass filter to remove extraneous laser light. The TPA cross section ( $\sigma_2$ ) was measured relative to fluorescein as a reference, as per the standard methodology of Webb *et al.*,<sup>1</sup> using the equation:

$$\sigma_2^S = \frac{\sigma_2^R \Phi_p^R c^R n^S F^S(\lambda)}{\Phi_p^S c^S n^R F^R(\lambda)}$$

The superscripts *R* and *S* refer to the reference and sample respectively,  $\Phi_p$  is the one photon photoluminescence quantum yield, *c* is the concentration, *n* is the solvent refractive index and *F*(λ) is the integrated two-photon emission spectrum. The sample and reference were recorded under identical pulse conditions. The concentration of the reference fluorescein was measured by UV-visible spectroscopy using  $\epsilon_{(492 \text{ nm})} = 88,000 \text{ dm}^3 \text{ mol}^{-1} \text{ cm}^{-1}$ , and a literature value<sup>1</sup> for fluorescein of  $\sigma_2 = 37 \text{ GM}$  at 780 nm in 0.1 M NaOH<sub>(aq)</sub> with  $\Phi_p = 0.9$  was used. The system was calibrated to correct for the dark noise of the detector and the photoluminescence spectrum was averaged over 100

measurements of 250 ms integration time. In-house software was used for data collection and analysis. Estimated error  $\pm 20\%$ .

The time-gated two-photon excited photoluminescence spectra were acquired with a lower repetition rate of 25 kHz and energy of 30 nJ pulse<sup>-1</sup>. The emission was detected using a photomultiplier tube (Hamamatsu H10682-01) attached to a dual-grating scanning monochromator (Princeton Instruments Acton SP2150). The TTL signal from the detector was gated using an AND logic gate with the timing being achieved using a variable duration TTL pulse synchronised with the laser cavity dumper driver. Spectra were recorded at 1 nm intervals with a 1 second integration time and are the average of 16 scans. Spectra are corrected for spectral response and dark background.

1. M. A. Albota, C. Xu and W. W. Webb, *Appl. Opt.*, 1998, **37**, 7352; C. Xu and W. W. Webb, *J. Opt. Soc. Am. B*, 1996, **13**, 481.

To confirm that a two-photon process had been observed, the integrated two-photon induced emission spectrum of the Ir complex was recorded as a function of laser intensity. To achieve this, a variable ND filter (Edmund Optics), mounted on a translation stage, was used to control the light intensity incident on the sample, with the power monitored by a free standing power meter whilst a series of spectra were recorded. The result is shown below (Fig. S1): the  $\log(\text{intensity})$  vs.  $\log(\text{power})$  graph is linear with a slope of  $1.9 \pm 0.1$  ( $R^2 = 0.99$ ), as required for a two-photon process.

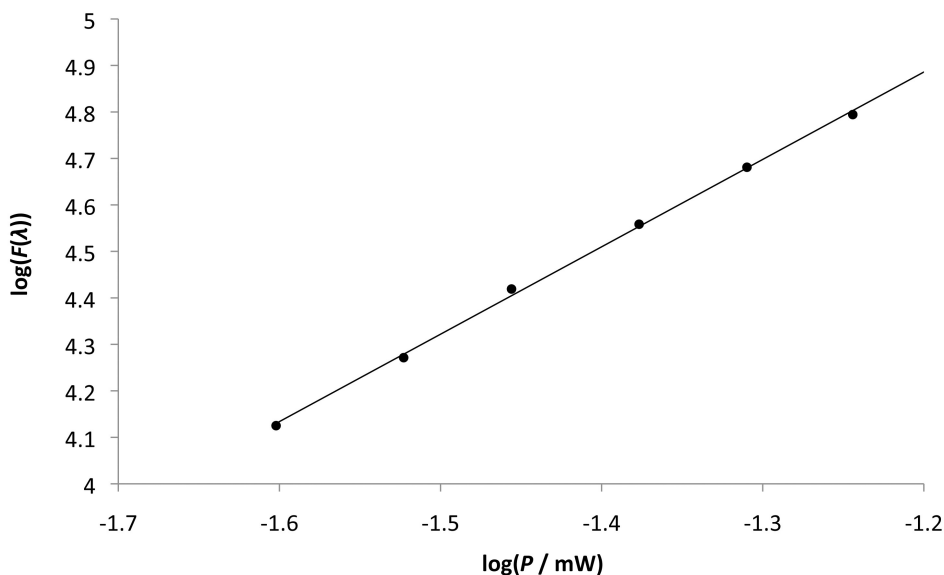

**Fig. S1.** Relationship of emission intensity from the Ir complex as a function of laser intensity at 780 nm, confirming the presence of a two-photon excitation process.
